# Supplementary material
Source: MDPI journal article supplement (https://www.mdpi.com/2073-4344/11/5/592)
Supplement: s1 [file s1]

Supplementary Materials

# Catalytic Hydrogenation of Carbon Dioxide over Magnetic Nanoparticles: Modification in Fixed-Bed Reactor

Mehnaz Bibi <sup>1</sup>, Rasheed Ullah <sup>1</sup>, Muhammad Sadiq <sup>1,\*</sup>, Saima Sadiq <sup>1,2</sup>, Idrees Khan <sup>3</sup>, Khalid Saeed <sup>3</sup>, Muhammad Abid Zia <sup>4</sup>, Zaffar Iqbal <sup>3</sup>, Inam Ullah <sup>1</sup>, Zahoor Iqbal <sup>1</sup> and Shahbaz Ahmad <sup>5</sup>

<sup>1</sup> Department of Chemistry, University of Malakand, Chakdara 18800, Pakistan; mehnazbb40@gmail.com (M.B.); rasheedullah555@gmail.com (R.U.); inamullah847@gmail.com (I.U.); arhamiqbal2017@gmail.com (Z.I.)

<sup>2</sup> Department of Chemistry, Kyungpook National University, Daegu 41566, Korea; saima@knu.ac.kr (S.S.);

<sup>3</sup> Department of Chemistry, Bacha Khan University, Charsadda 24420, Pakistan; idreeschem\_uom@yahoo.com (I.K.); khalidkhalil2002@yahoo.com (K.S.); zaffaricup@gmail.com (Z.I.)

<sup>4</sup> Department of Chemistry, University of Education, Attock Campus, Attock 43600, Pakistan; abid@ue.edu.pk (M.A.Z.)

<sup>5</sup> College of Life Science and Technology, Beijing University of Chemical Technology, Beijing 100029, China; shahbazbbbt19@yahoo.com (S.A.)

\* Correspondence: sadiq@uom.edu.pk or mohammad\_sadiq26@yahoo.com; Tel.: +92-945-763441; Fax: +92-945-763491

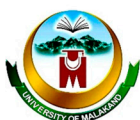

## Finger Projected Fixed-Fed Reactor

Sketch of whole reaction setup. Which consist of five FPFBR. On the one side it has saturator from which reactants feed to reactors while on the other side the reactor connected to six port valve through which product sent to GC for analysis. The saturator has a stabilizer and can maintained pressure.

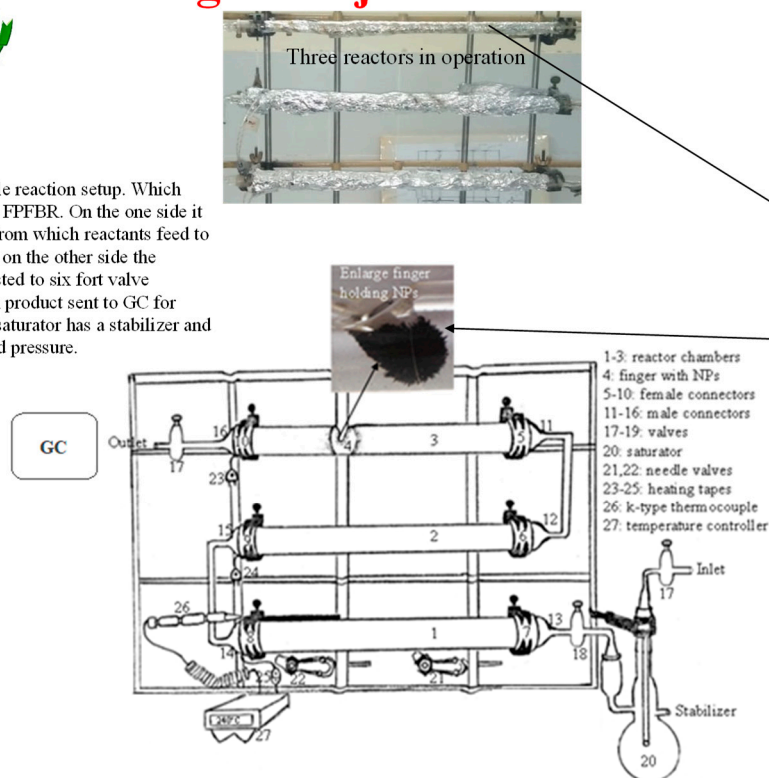

Modifies fixed bed reactor which is 80cm long quartz glass chamber with 20mm diameter consist of 18 fingers projected toward inside with a groove to out side. The groove has magnets which hold the magnetic NPs. Means we have 18 fixed beds in the reactor

**Figure S1.** Schematic diagram of reaction setup and Finger Projected Fixed-Fed Reactor (FPFBR) used for hydrogenation of CO<sub>2</sub> to methanol.

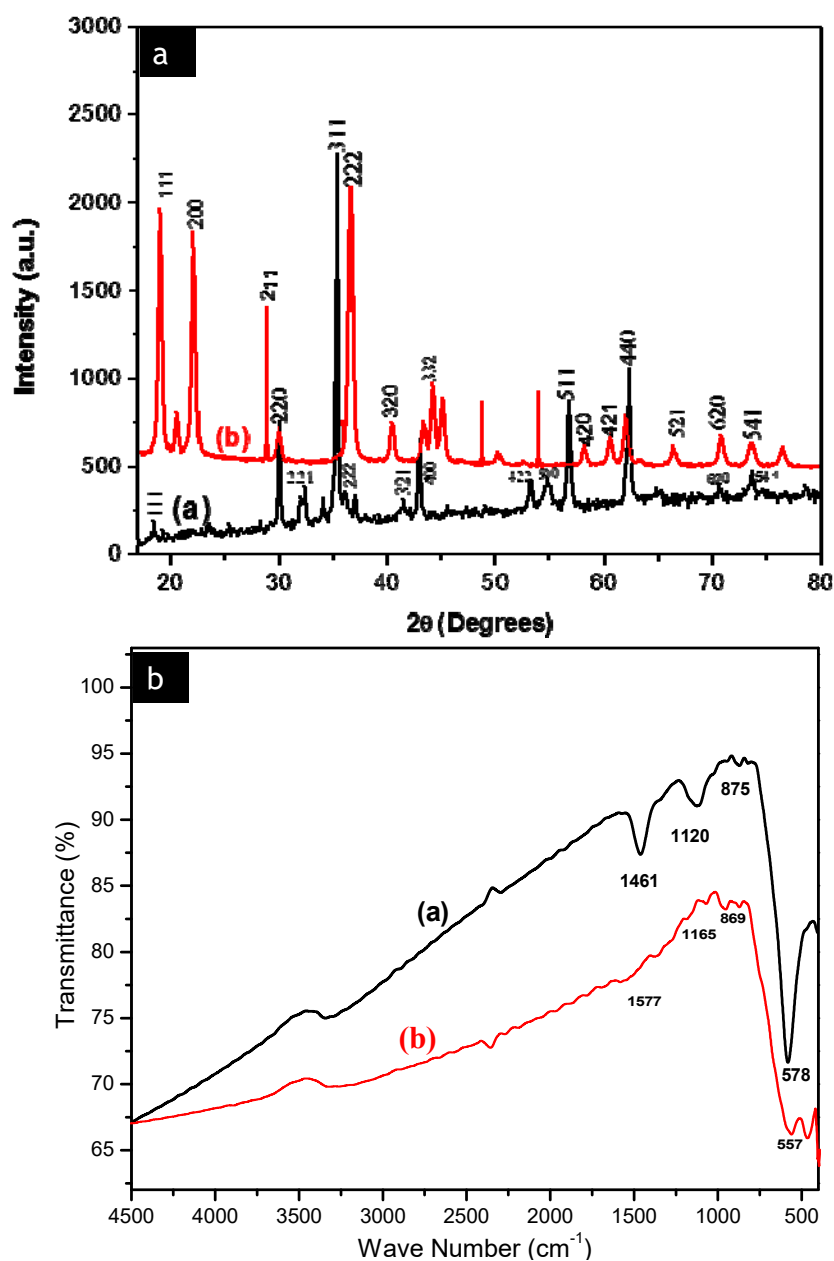

**Figure S2.** (a) XRD pattern of MnFe<sub>2</sub>O<sub>4</sub> (pattern a), Bi-MnFe<sub>2</sub>O<sub>4</sub> (pattern b), (b); FTIR spectra of MnFe<sub>2</sub>O<sub>4</sub> (curve a), Bi-MnFe<sub>2</sub>O<sub>4</sub> (curve b).

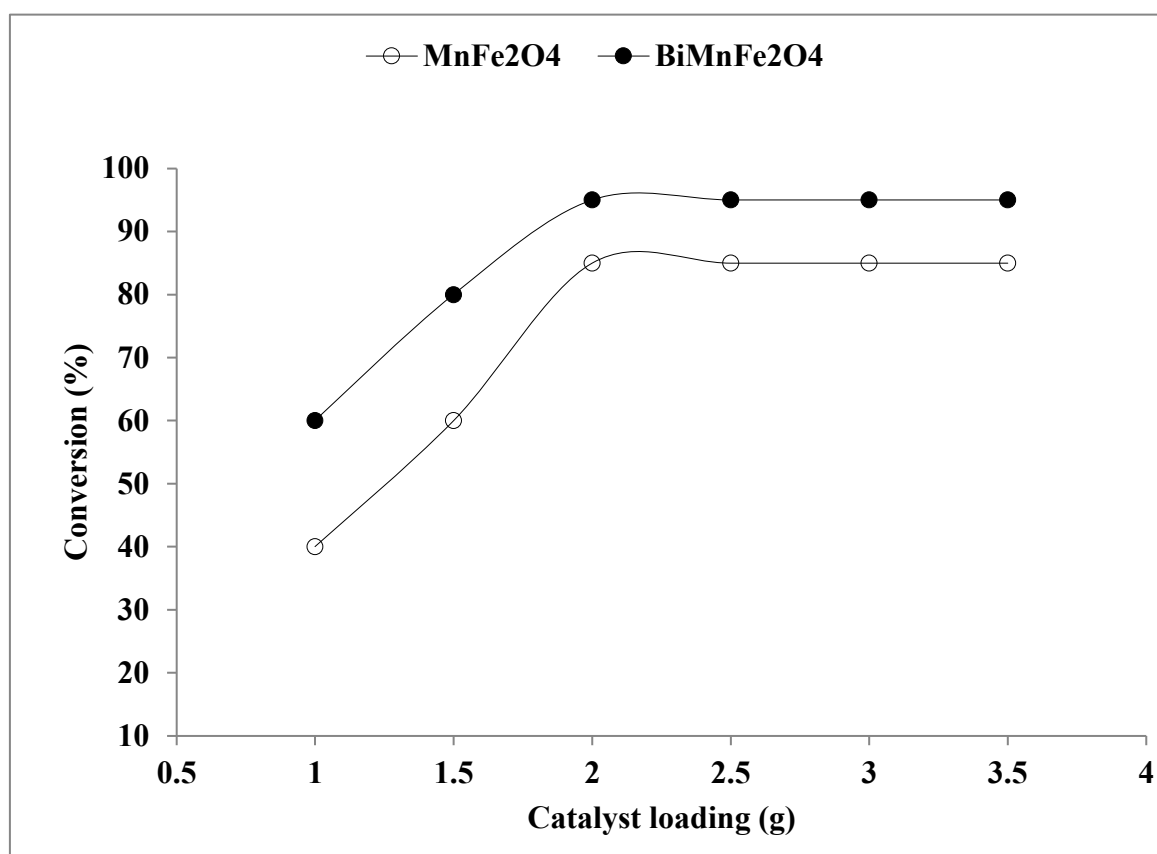

**Figure S3.** Effect of catalyst loading per chamber on the rate of CO<sub>2</sub> hydrogenation to MeOH. Reaction conditions; pressure: 1 bar, Temp: 413–513K, data collected after 90 min, feed ratio 3/1: H<sub>2</sub>/CO<sub>2</sub>

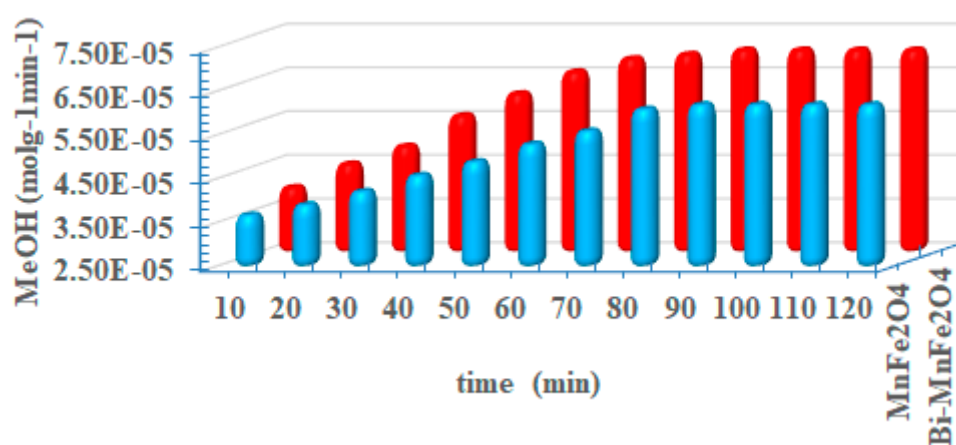

**Figure S4.** Comparison of the catalytic activity of MnFe<sub>2</sub>O<sub>4</sub> and Bi-MnFe<sub>2</sub>O<sub>4</sub> for CO<sub>2</sub> conversion to MeOH. Reaction Conditions: Pressure: 1 bar, Temp: 220 °C, Catalyst: 2g/chamber, feed ratio 3/1: H<sub>2</sub>/CO<sub>2</sub>.

**Table S1.** Different types of reactors used for hydrogenation of CO<sub>2</sub> to MeOH under various reaction conditions.

| Entry No | Catalyst                                   | Reactor type | Temp (K)  | Pressure (bar) | E <sub>a</sub> (kJ/mol) | Ref.   |
|----------|--------------------------------------------|--------------|-----------|----------------|-------------------------|--------|
| 1        | Cu/SiO <sub>2</sub>                        | *TKA         | 403 – 453 | 6              | 133                     | [1]    |
| 2        | SiC QDs                                    | Slurry       | 423       | 32             | 48.6                    | [2]    |
| 3        | CeO <sub>x</sub> /Cu                       | Batch        | 500– 600  | 5              | 106.3                   | [3]    |
| 4        | Cu/ZnO/Al <sub>2</sub> O <sub>3</sub>      | Fixed bed    | 473 – 573 | 30             | 44                      | [4]    |
| 5        | Cu/SiO <sub>2</sub> + ZnO/SiO <sub>2</sub> | Fixed bed    | 523 – 723 | 50             | 86-96                   | [5]    |
| 6        | Cu/ZnO                                     | Fixed bed    | 525 – 575 | 5              | 116.7                   | [6]    |
| 7        | Cu/CeO <sub>x</sub> /TiO <sub>2</sub>      | Batch        | 500 – 600 | 5              | 50.2                    | [7]    |
| 8        | C/Pd–ZnO                                   | Fixed bed    | 503 – 543 | 20             | 56.8                    | [8]    |
| 9        | Cu/ZnO                                     | **TQR        | 423– 573  | 1              | -                       | [9]    |
| 10       | Pd–CuZnO                                   | Fixed bed    | 503– 543  | 45             | 31                      | [10]   |
| 11       | MnFe <sub>2</sub> O <sub>4</sub>           | ***FPFBR     | 413 – 513 | 1              | 115.2                   | Recent |
| 12       | Bi–MnFe <sub>2</sub> O <sub>4</sub>        | ***FPFBR     | 413 – 513 | 1              | 100                     | Recent |

\*Transient Kinetics Analysis (TKA) reactor system, \*\*Tubular Quartz Reactor (45 cm length and 1 cm diameter),

\*\*\*Finger projected fixed-bed reactor

## References

1. Y. Yang, C. A. Mims, R. S. Disselkamp, C. H. Peden and C. Campbell "Simultaneous MS-IR Studies of Surface Formate Reactivity Under Methanol Synthesis Conditions on Cu/SiO<sub>2</sub>" *Topics in Catalysis* 52(10), 1440-1447 (2009).
2. Y. Wang, S. Kattel, W. Gao, K. Li, P. Liu, J. G. Chen and H. Wang "Exploring the ternary interactions in Cu–ZnO–ZrO<sub>2</sub> catalysts for efficient CO<sub>2</sub> hydrogenation to methanol" *Nature communications* 10(1), 1-10 (2019).
3. C.-L. Chiang, K.-S. Lin, P.-J. Hsu and Y.-G. Lin "Synthesis and characterization of magnetic zinc and manganese ferrite catalysts for decomposition of carbon dioxide into methane" *international journal of hydrogen energy* 42(34), 22123-22137 (2017).
4. M. Bukhtiyarova, T. Lunkenbein, K. Kähler and R. Schlögl "Methanol synthesis from industrial CO<sub>2</sub> sources: a contribution to chemical energy conversion" *Catalysis Letters* 147(2), 416-427 (2017).
5. Z. Iqbal, S. Sadiq, M. Sadiq, M. Ali, K. Saeed, N. Ur Rehman, M. Ilyas, S. Ullah, S. Ullah Jan and I. Ahmad "Synergetic Effect of Calcium Doping on Catalytic Activity of Manganese Ferrite: DFT Study and Oxidation of Hydrocarbon" *Crystals* 10(4), 335 (2020).

6. Y. Yang, J. Liu, B. Zhang and F. Liu "Density functional theory study on the heterogeneous reaction between  $\text{HgO}$  and  $\text{HCl}$  over spinel-type  $\text{MnFe}_2\text{O}_4$ " *Chemical Engineering Journal* 308, 897-903 (2017).
7. S. Kattel, P. J. Ramírez, J. G. Chen, J. A. Rodriguez and P. Liu "Active sites for  $\text{CO}_2$  hydrogenation to methanol on  $\text{Cu/ZnO}$  catalysts" *Science* 355(6331), 1296-1299 (2017).
8. B. Hu, Y. Yin, G. Liu, S. Chen, X. Hong and S. C. E. Tsang "Hydrogen spillover enabled active  $\text{Cu}$  sites for methanol synthesis from  $\text{CO}_2$  hydrogenation over  $\text{Pd}$  doped  $\text{CuZn}$  catalysts" *Journal of Catalysis* 359, 17-26 (2018).
9. Y. Peng, L. Wang, Q. Luo, Y. Cao, Y. Dai, Z. Li, H. Li, X. Zheng, W. Yan and J. Yang "Molecular-level insight into how hydroxyl groups boost catalytic activity in  $\text{CO}_2$  hydrogenation into methanol" *Chem* 4(3), 613-625 (2018).
10. K. Ahmad and S. Upadhyayula "Greenhouse gas  $\text{CO}_2$  hydrogenation to fuels: A thermodynamic analysis" *Environmental Progress & Sustainable Energy* 38(1), 98-111 (2019).
